# Supplementary material for: Associations between Mobility, Cognition, and Brain Structure in Healthy Older Adults
Source: PubMed Central journal article supplement (PMC5440513; doi:10.3389/fnagi.2017.00155), 2017-05-23

Supplementary Image 1. Flow diagram of participant attrition.

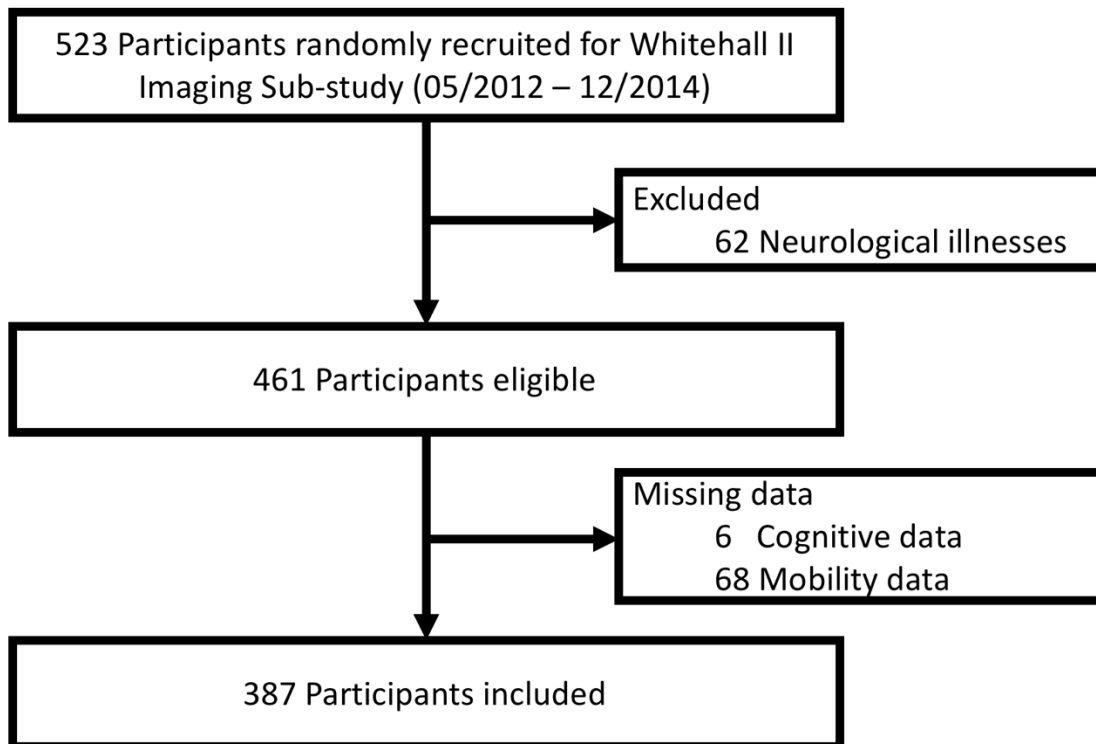

Supplement: Image_1.pdf [file Image_1.pdf]
