# Supplementary material for: Associations between Mobility, Cognition, and Brain Structure in Healthy Older Adults
Source: PubMed Central journal article supplement (PMC5440513; doi:10.3389/fnagi.2017.00155), 2017-05-23
Supplement: Table_1.pdf [file Table_1.pdf]

Supplementary Table 1. Sample demographics of included (complete data) and excluded (missing data) participants.

|                     | Complete<br>Data | Missing<br>Data | t    | p    |
|---------------------|------------------|-----------------|------|------|
| <i>Demographics</i> |                  |                 |      |      |
| N                   | 387              | 167             |      |      |
| Age (years)         | 69 ± 5.1         | 70.6 ± 5.6      | 3.4  | .001 |
| Sex (N, % Female)   | 73 (19%)         | 31 (19%)        | -.08 | .934 |
| Education Level     | 3.6 ± 1.1        | 3.2 ± 1.1       | -3.3 | .001 |

Values are mean ± standard deviation and *p* values are two-tailed.
