# Supplementary material for: Associations between Mobility, Cognition, and Brain Structure in Healthy Older Adults
Source: PubMed Central journal article supplement (PMC5440513; doi:10.3389/fnagi.2017.00155), 2017-05-23
Supplement: Table_2.pdf [file Table_2.pdf]

Supplementary Table 2. Associations of mobility measures at time-point 1 with cognitive function and MRI measures at time-point 2, stratified by age (N= 251, 60-69years; N= 136, 70+years).

|                               | Chair stands (s) |              |               |                  | Walking time (s) |                  |             |       | Balance (s position held) |              |              |              |
|-------------------------------|------------------|--------------|---------------|------------------|------------------|------------------|-------------|-------|---------------------------|--------------|--------------|--------------|
|                               | 60-69 years      |              | 70+ years     |                  | 60-69 years      |                  | 70+ years   |       | 60-69 years               |              | 70+ years    |              |
|                               | Pearson's r      | p            | Pearson's r   | p                | Pearson's r      | p                | Pearson's r | p     | Cohen's d                 | p            | Cohen's d    | p            |
| <i>Executive Function</i>     |                  | 0.416        |               | <b>0.006</b>     |                  | <b>0.004</b>     |             | 0.775 |                           | 0.356        |              | 0.230        |
| <b>Digit Span: Forward</b>    | 0.031            | 0.694        | 0.002         | 0.523            | -0.086           | 0.077            | -0.029      | 0.632 | 0.041                     | 0.393        | 0.179        | 0.181        |
| <b>Digit Span: Backward</b>   | 0.073            | 0.876        | -0.091        | 0.145            | <b>-0.125</b>    | <b>0.021</b>     | 0.056       | 0.255 | 0.142                     | 0.183        | <b>0.324</b> | <b>0.050</b> |
| <b>Digit Span: Sequence</b>   | -0.004           | 0.478        | <b>-0.251</b> | <b>0.001</b>     | -0.076           | 0.109            | -0.019      | 0.599 | 0.094                     | 0.283        | 0.149        | 0.229        |
| <b>Fluency: Category</b>      | <b>-0.145</b>    | <b>0.011</b> | -0.032        | 0.356            | <b>-0.200</b>    | <b>&lt;0.001</b> | 0.126       | 0.067 | 0.026                     | 0.442        |              | -0.190       |
| <b>Fluency: Letter</b>        | 0.063            | 0.843        | <b>-0.257</b> | <b>&lt;0.001</b> | -0.048           | 0.219            | 0.063       | 0.232 | 0.004                     | 0.491        | 0.058        | 0.386        |
| <b>TMT: B*</b>                | 0.127            | 0.980        | -0.082        | 0.153            | -0.097           | 0.066            | 0.003       | 0.496 | 0.078                     | 0.306        | 0.019        | 0.465        |
| <i>Memory</i>                 |                  | 0.293        |               | 0.406            |                  | <b>0.004</b>     |             | 0.853 |                           | 0.378        |              | 0.307        |
| <b>HVLT-R: Total Recall</b>   | 0.008            | 0.553        | -0.086        | 0.154            | <b>-0.168</b>    | <b>0.004</b>     | -0.052      | 0.723 | 0.060                     | 0.347        | -0.067       | 0.630        |
| <b>HVLT-R: Delayed Recall</b> | -0.040           | 0.255        | 0.001         | 0.491            | <b>-0.166</b>    | <b>0.005</b>     | -0.022      | 0.595 | <b>0.271</b>              | <b>0.046</b> | -0.034       | 0.564        |
| <b>HVLT-R: Recognition</b>    | 0.035            | 0.707        | 0.081         | 0.828            | <b>-0.179</b>    | <b>0.003</b>     | 0.009       | 0.454 | -0.081                    | 0.691        | 0.076        | 0.341        |
| <b>RCF: Immediate Recall</b>  | -0.082           | 0.097        | -0.052        | 0.270            | -0.064           | 0.153            | -0.092      | 0.875 | 0.038                     | 0.405        | 0.212        | 0.134        |
| <b>RCF: Delayed Recall</b>    | -0.074           | 0.122        | -0.076        | 0.185            | -0.022           | 0.364            | -0.057      | 0.753 | 0.013                     | 0.468        | 0.283        | 0.070        |
| <b>RCF: Recognition</b>       | 0.003            | 0.518        | 0.062         | 0.762            | -0.047           | 0.226            | -0.130      | 0.939 | -0.175                    | 0.869        | -0.059       | 0.626        |

|                                       |               |                  |               |              |               |              |               |                  |              |              |        |              |
|---------------------------------------|---------------|------------------|---------------|--------------|---------------|--------------|---------------|------------------|--------------|--------------|--------|--------------|
| <i>Processing Speed</i>               |               | <i>0.002</i>     |               | <i>0.003</i> |               | <i>0.081</i> |               | <i>&lt;0.001</i> |              | <i>0.029</i> |        | <i>0.262</i> |
| TMT: A*                               | -0.012        | 0.416            | <b>-0.195</b> | <b>0.011</b> | -0.094        | 0.072        | 0.055         | 0.752            | 0.230        | 0.080        | 0.052  | 0.393        |
| Digit Coding*                         | <b>-0.077</b> | <b>0.099</b>     | <b>-0.161</b> | <b>0.024</b> | <b>-0.115</b> | <b>0.029</b> | -0.089        | 0.137            | 0.257        | 0.052        | 0.314  | 0.057        |
| Simple: Reaction Time*                | <b>-0.122</b> | <b>0.028</b>     | <b>-0.241</b> | <b>0.003</b> | -0.050        | 0.206        | <b>-0.250</b> | <b>0.002</b>     | 0.145        | 0.173        | 0.009  | 0.473        |
| Choice: Reaction Time*                | <b>-0.119</b> | <b>0.027</b>     | <b>-0.217</b> | <b>0.007</b> | 0.040         | 0.742        | <b>-0.250</b> | <b>0.003</b>     | 0.247        | 0.062        | 0.206  | 0.148        |
| Simple: Movement Time*                | <b>-0.206</b> | <b>&lt;0.001</b> | -0.070        | 0.203        | -0.058        | 0.176        | <b>-0.358</b> | <b>&lt;0.001</b> | <b>0.264</b> | <b>0.049</b> | -0.104 | 0.703        |
| Choice: Movement Time*                | <b>-0.130</b> | <b>0.019</b>     | -0.128        | 0.069        | -0.076        | 0.113        | <b>-0.359</b> | <b>&lt;0.001</b> | 0.184        | 0.126        | 0.036  | 0.423        |
| <i>MRI measures</i>                   |               |                  |               |              |               |              |               |                  |              |              |        |              |
| Global gray matter volume (% of TBV)  | <b>-0.156</b> | <b>0.006</b>     | -0.095        | 0.121        | -0.093        | 0.059        | -0.039        | 0.318            | <b>0.349</b> | <b>0.014</b> | 0.074  | 0.350        |
| Global white matter volume (% of TBV) | 0.116         | 0.974            | -0.024        | 0.384        | -0.054        | 0.197        | 0.035         | 0.670            | 0.182        | 0.124        | 0.105  | 0.292        |

Model 1: Analyses are adjusted for age, sex and education.

\*Scores have been reversed so that increasing scores indicate better performance.

P-values for individual tests are not corrected for multiple comparisons. TBV = Total brain volume.
